# Supplementary material for: Low-temperature preparation of macroscopic nitrogen-doped graphene hydrogel for high-performance ultrafast supercapacitors
Source: Royal Society of Chemistry journal article supplement (doi:10.1039/c4ra09497b), 2014-12-05
Supplement: c4ra09497b1.pdf [file c4ra09497b1.pdf]

## Supporting Information

### 1. Preparation of GO GH and N-GH

Synthesis of GO: 60 mL  $\text{H}_2\text{SO}_4$  was added to 2 g graphite in an ice bath. The resulting preoxidized product was added to 10g  $\text{KMnO}_4$  slowly. The mixture was then heated to  $30^\circ\text{C}$  and stirred for 3 hours. Subsequently, 350 mL of water was added drop by drop and controlled the temperature under  $90^\circ\text{C}$ . After 30 mins stirring, 10 mL 30%  $\text{H}_2\text{O}_2$  was injected into the solution to react with the excess  $\text{KMnO}_4$ . Finally, the resulting mixture was washed and then freeze-dried.

Synthesis of N-GH: a 2 mg/ml solution of graphene oxide was prepared firstly. Then, 1 mL GO solution and 2mL(1 mL, 500 $\mu\text{L}$ ) ammonia were placed together with the weight ratio of  $\text{NH}_3 \text{H}_2\text{O}/\text{GO} = 1:2(1:4, 1:8)$ . Subsequently, 52 $\mu\text{L}$   $\text{Na}_2\text{S}$  was added into the solution. Finally, the samples were placed in the oven and heated at  $90^\circ\text{C}$  for 8 hours. After cooling to room temperature, the N-GH samples were obtained.

Synthesis of GH: a 2 mg/ml solution of graphene oxide was prepared firstly. Then, 1 mL GO solution and 2mL(1 mL, 500 $\mu\text{L}$ ) deionized water. Subsequently, 52 $\mu\text{L}$   $\text{Na}_2\text{S}$  was added into the solution. Finally, the samples were placed in the oven and heated at  $90^\circ\text{C}$  for 8 hours. After cooling to room temperature, the GH samples were obtained.

### 2. EDS images of the GH and N-GH

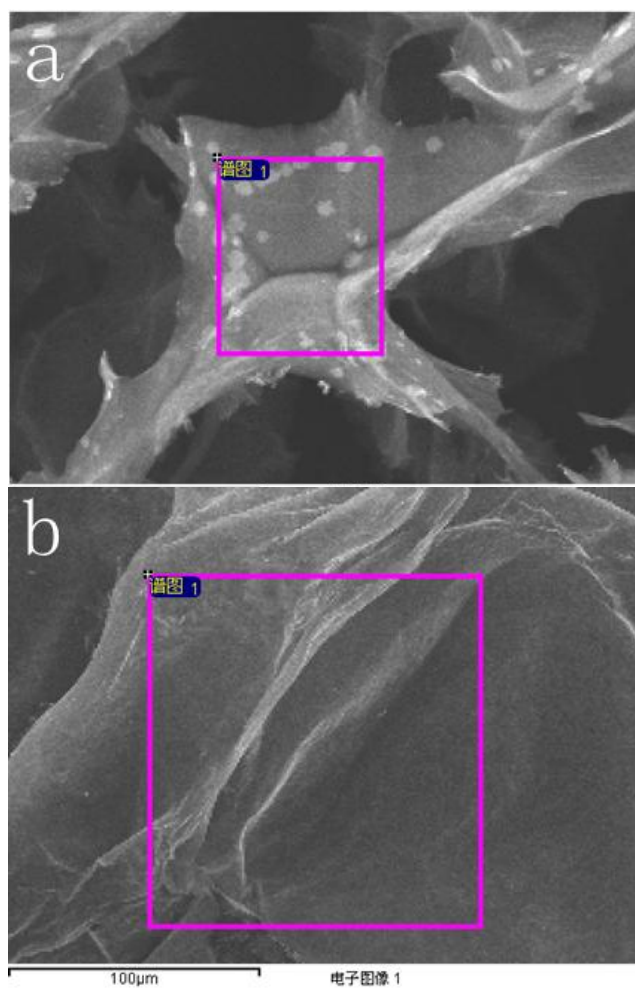

Fig. S (a) EDS images of the N-GH (b) EDS images of the GH

Table 1

| <i>sample</i> | <i>C</i><br><i>content(at%)</i> | <i>O</i><br><i>content(at%)</i> | <i>N</i><br><i>Content(at%)</i> |
|---------------|---------------------------------|---------------------------------|---------------------------------|
| N-GH4         | 76.59                           | 9.58                            | 13.44                           |
| GH            | 83.90                           | 10.58                           | 0                               |

Figure S1 and table 1 indicates that the reaction between NH<sub>3</sub> and oxygenic groups in GO has been completed and results in a high atomic percentage of N up to 13.44% in N-GH.
